# Supplementary material for: Preparation of CdTe superparticles for white light-emitting diodes without Förster resonance energy transfer
Source: Royal Society of Chemistry journal article supplement (doi:10.1039/c9ra06254h), 2019-01-01
Supplement: c9ra06254h1.pdf [file c9ra06254h1.pdf]

**Supporting Information:**

**Preparation of CdTe Superparticles for White Light-Emitting Diodes  
without Förster Resonance Energy Transfer**

*Haoyang Zou,<sup>a</sup> Deli Wang,<sup>\*b</sup> Baijuan Gong,<sup>\*c</sup> Yi Liu,<sup>\*a</sup>*

<sup>a</sup>State Key Laboratory of Supramolecular Structure and Materials, Jilin University, Changchun 130012, P. R. China.

<sup>b</sup>School of Life Sciences, Jilin University, Changchun 130012, P. R. China.

<sup>c</sup>Department of Orthodontics, Jilin University, School and Hospital of Stomatology, #1500 Qinghua Road, Changchun, Jilin, 130021, P. R. China.

**Figure S1.** XRD patterns of the as-prepared CdTe NPs (black line) and CdTe SPs (red line).

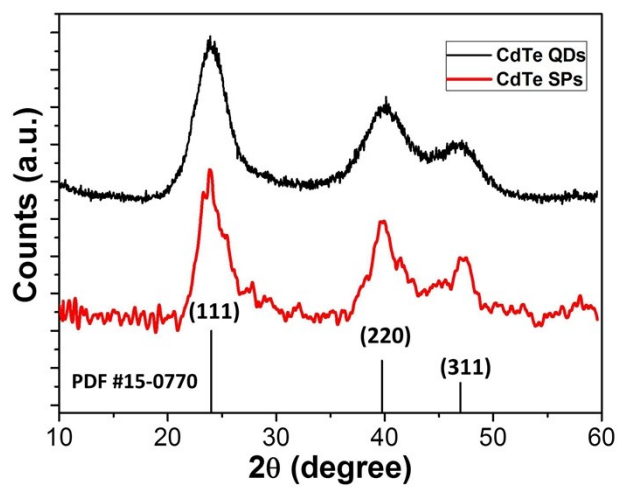

**Figure S2.** SEM images of green-emitting CdTe SPs (a) and red-emitting CdTe SPs (b) prepared with same synthetic procedure. The average sizes of both SPs are 130 nm.

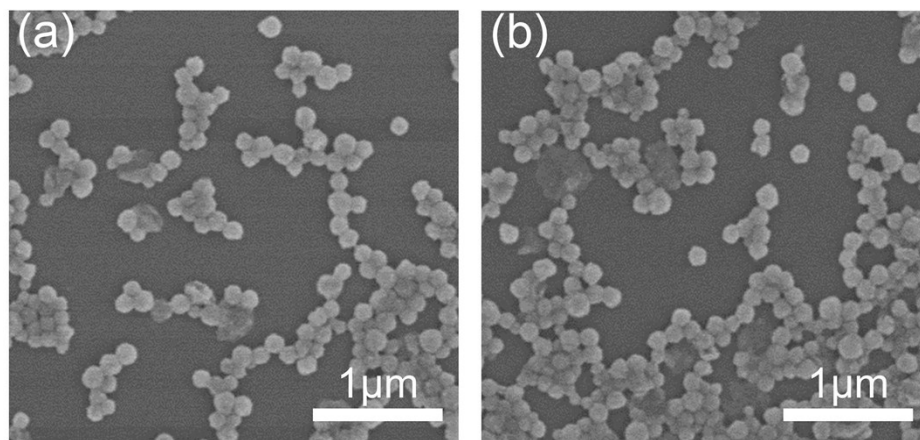

**Figure S3.** PL emission spectra of CdTe SPs before and after storing in the air for 3 months.

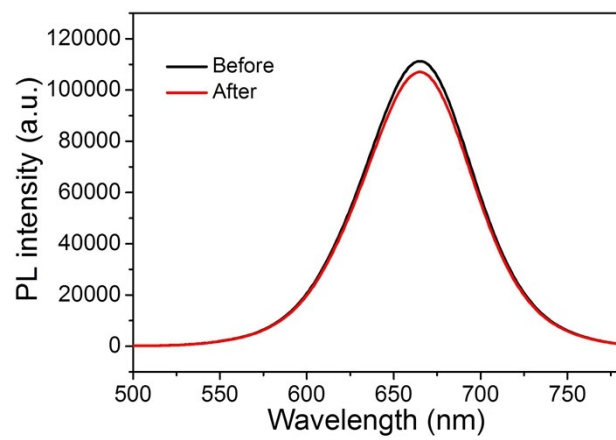

**Figure S4.** TEM image of CdTe SP-PVA composite film.

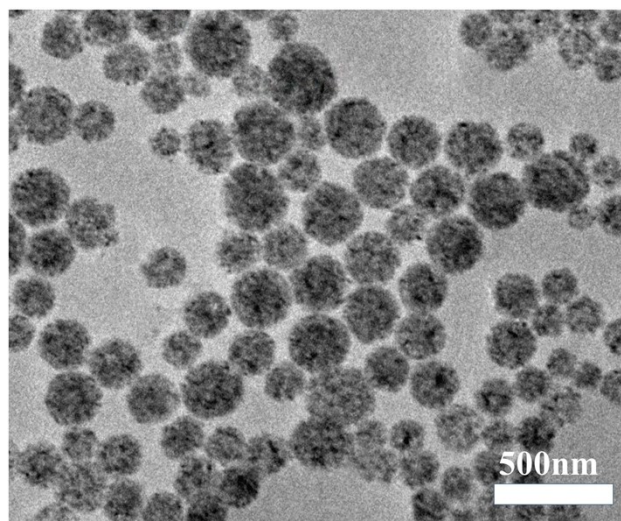

**Figure S5.** PL emission spectrum (a) and CIE (b) of the LED fabricated by mixing green-, yellow-, and red-emitting CdTe QDs in a certain ratio.

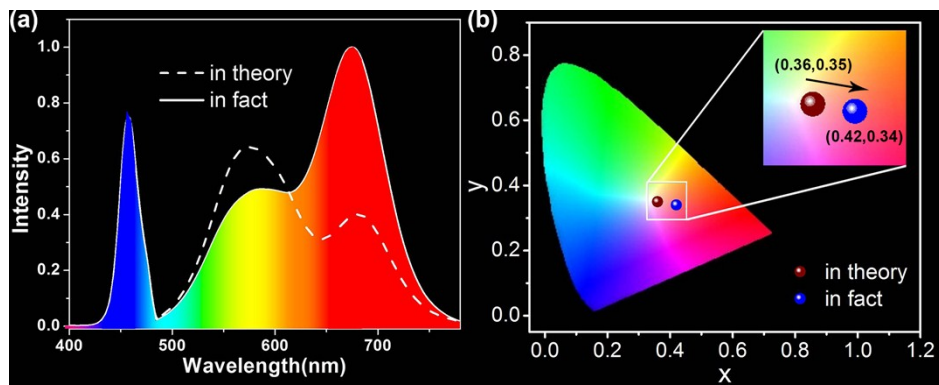

**Table S1.** Effect of reflux time on size, PL wavelength of maximum emission, and color of CdTe QDs.

| reflux time(h) | QD size(nm) | PL wavelength (nm) | color  |
|----------------|-------------|--------------------|--------|
| 0.6            | 1.29        | 510                | green  |
| 4              | 3.12        | 560                | yellow |
| 9              | 3.56        | 600                | orange |
| 20             | 4.12        | 650                | red    |

**Table S2.** Molar ratio of Cd/Te in CdTe NPs and SPs analyzed by ICP.

|     | Cd    | Te   | Cd/Te |
|-----|-------|------|-------|
| NPs | 177.5 | 18.3 | 9.7/1 |
| SPs | 45.9  | 24.2 | 1.9/1 |
